# Supplementary material for: Isoginkgetin derivative IP2 enhances the adaptive immune response against tumor antigens
Source: PubMed Central journal article supplement (PMC7921396; doi:10.1038/s42003-021-01801-2), 2021-03-01

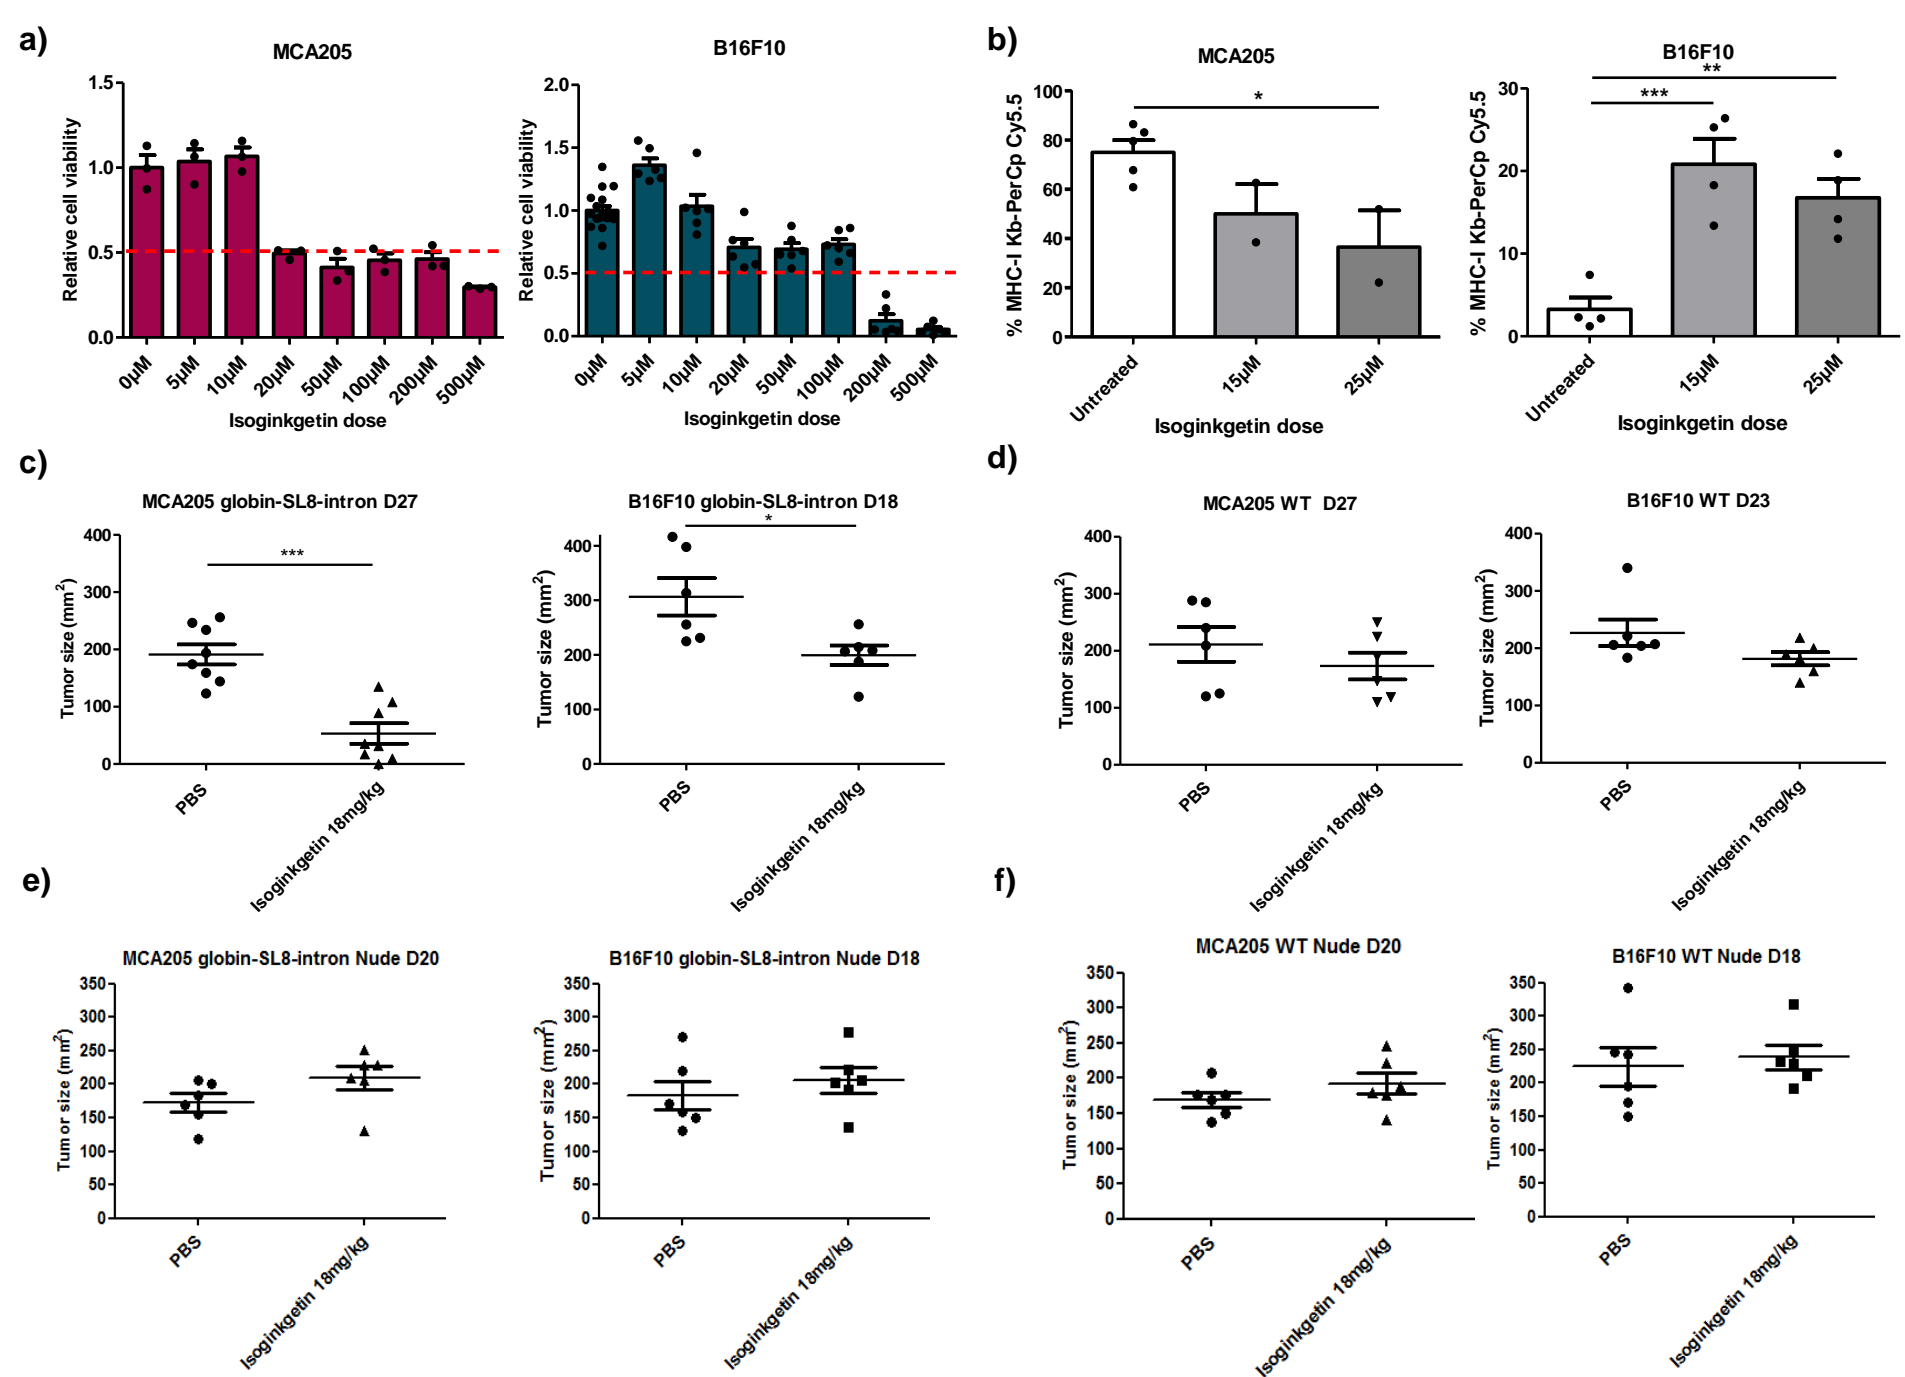

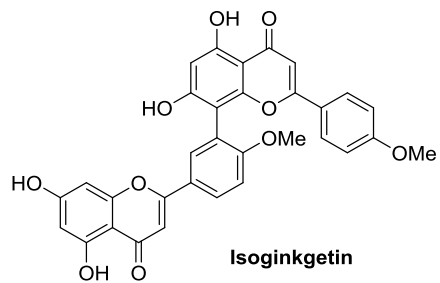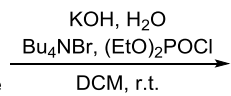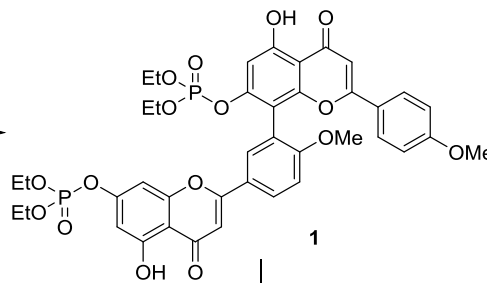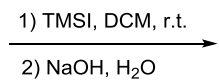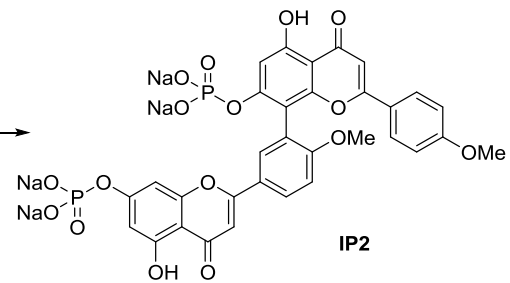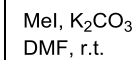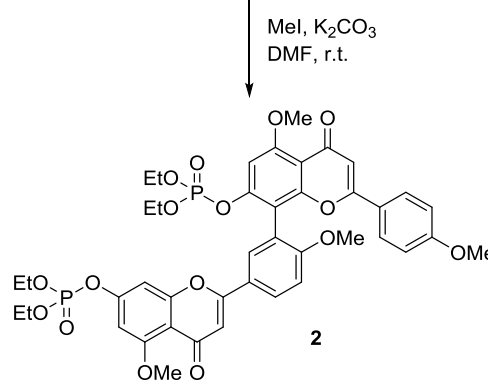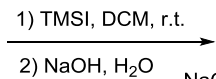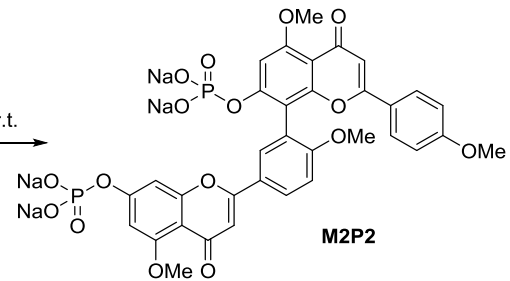

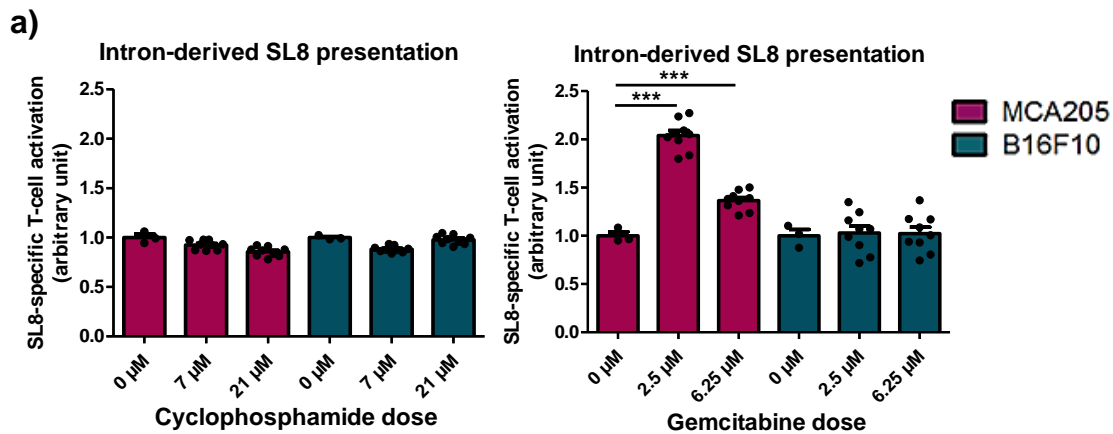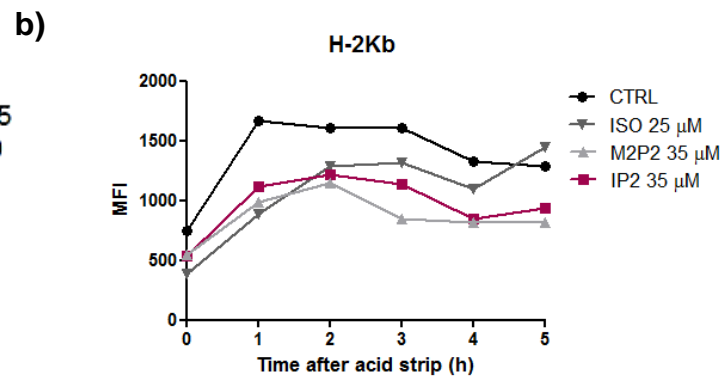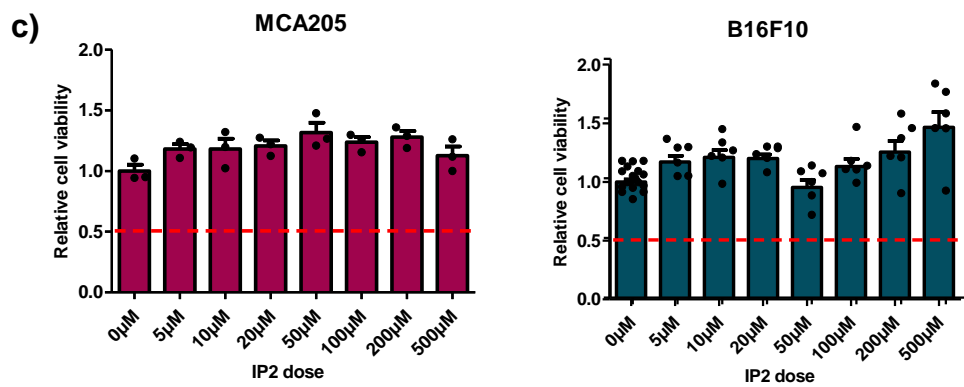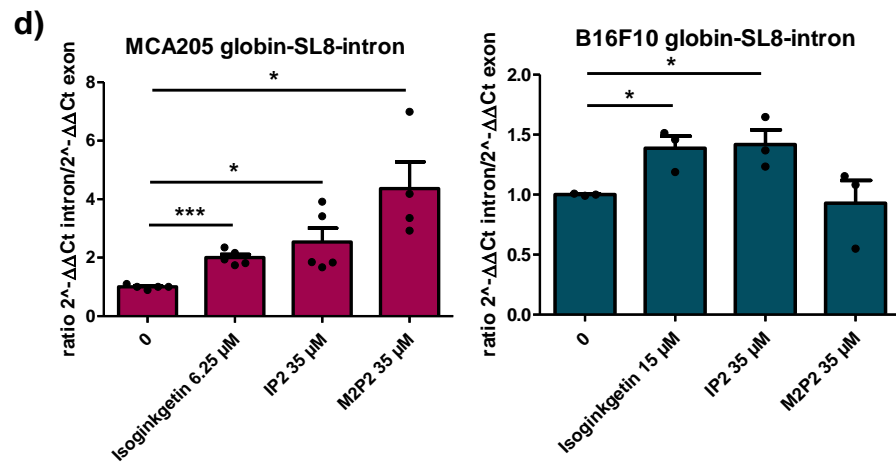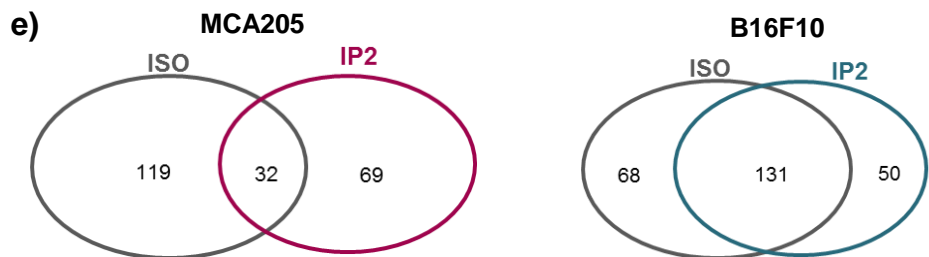

a)

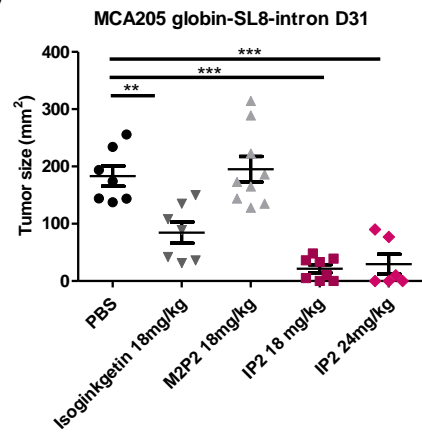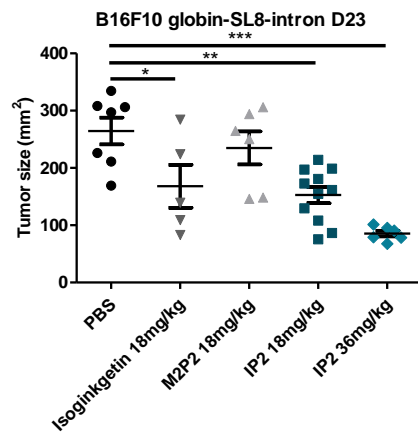

b)

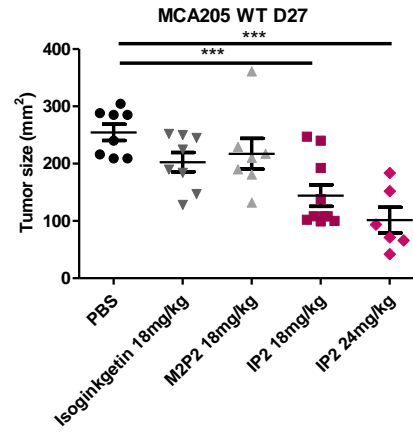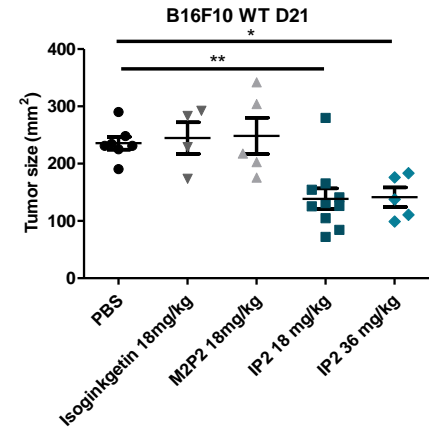

c)

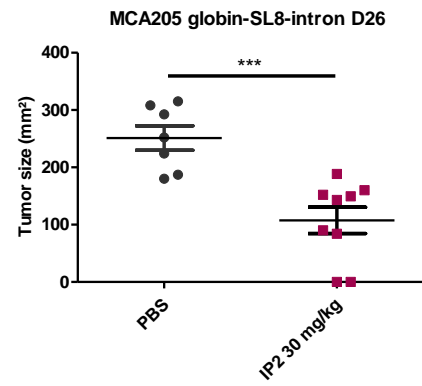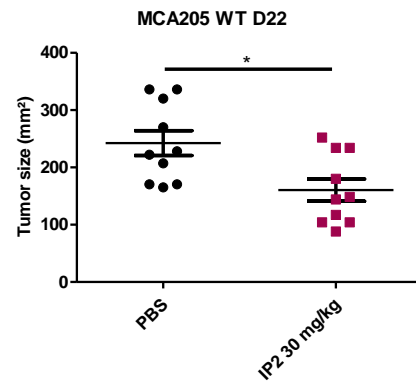

a)

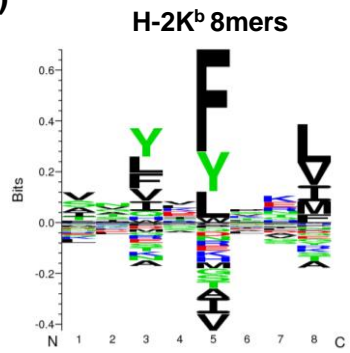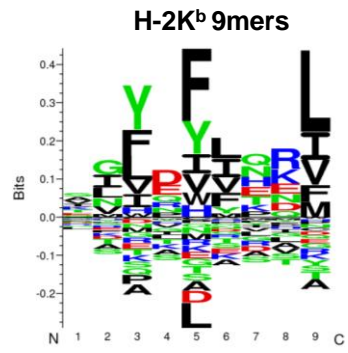

b)

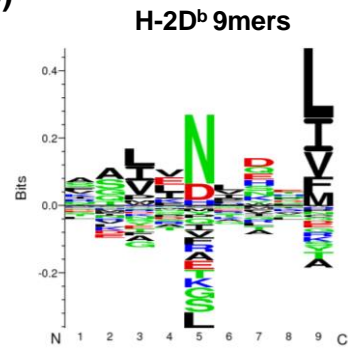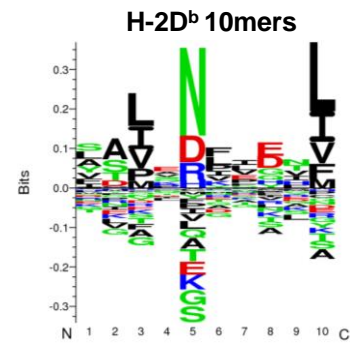

a)

**TL9 SLP:** GQIIFLPFTCIGYTD**TNQDFIQRL**STLIRQAIERQLPAW

**Irrelevant SLP :** SIDSVRRLEHKLAEEESFPGFVNLNSTETQTAGVIDRWA

b)

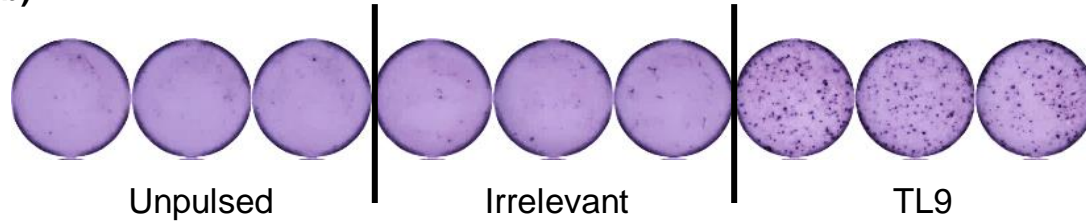

c)

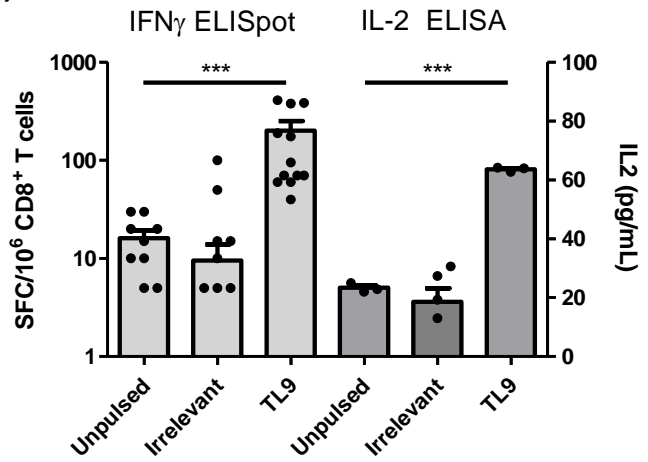

Supplement: 42003_2021_1801_MOESM1_ESM.pdf [file 42003_2021_1801_MOESM1_ESM.pdf]
